# Supplementary material for: Synthesis, characterization and photo-catalytic activity of guar-gum-g-aliginate@silver bionanocomposite material
Source: Royal Society of Chemistry journal article supplement (doi:10.1039/d0ra00163e), 2020-01-01
Supplement: d0ra00163e1.pdf [file d0ra00163e1.pdf]

## Supporting Information

### Synthesis, Characterization and Photocatalytic activity of Guar Gum-g- Aliginate@Silver Bionanocomposite Material

Imran Hasan,<sup>a,\*</sup> Rais Ahmad Khan,<sup>b\*</sup> Walaa Alharbi,<sup>c</sup> Khadijah H. Alharbi,<sup>d</sup> Maymonah  
Abu Khanjer,<sup>b</sup> Ali Alslame,<sup>b</sup>

<sup>a\*</sup>*Environmental Research Laboratory, Department of Chemistry, Chandigarh University,  
Gharuan, Mohali, Punjab, 140301, India.*

*Mob No: +91-8171878193 Email: [imranhasan98@gmail.com](mailto:imranhasan98@gmail.com)*

<sup>b\*</sup>*Department of Chemistry, College of Science, King Saud University, Riyadh-11451, KSA.*

<sup>c</sup>*Department of Chemistry, Faculty of Science, King Khalid University, P.O. Box 9004 Abha,  
KSA.*

<sup>d</sup>*Department of Chemistry, Science and Arts College, Rabigh Campus, King Abdulaziz  
University, Jeddah, KSA*

**Table S1.** Design Table including experimental and predicted response

| <b>Factor 1</b> | <b>Factor 2</b> | <b>Factor 3</b> | <b>Factor 4</b> | <b>Experimental Response 1</b> | <b>Predicted Response</b> |
|-----------------|-----------------|-----------------|-----------------|--------------------------------|---------------------------|
| <b>Time</b>     | <b>pH</b>       | <b>Conc</b>     | <b>Dose</b>     | <b>R1</b>                      |                           |
| <b>min</b>      |                 | <b>mg/L</b>     | <b>(g)</b>      | <b>mg/g</b>                    | <b>mg/g</b>               |
| 60              | 3               | 100             | 0.07            | 17.74                          | 17.21                     |
| 140             | 3               | 100             | 0.07            | 21.39                          | 23.06                     |
| 60              | 7               | 100             | 0.07            | 12.75                          | 12.96                     |
| 140             | 7               | 100             | 0.07            | 17.05                          | 18.25                     |
| 60              | 3               | 200             | 0.07            | 23.13                          | 21.00                     |
| 140             | 3               | 200             | 0.07            | 26.45                          | 27.73                     |
| 60              | 7               | 200             | 0.07            | 20.85                          | 20.27                     |
| 140             | 7               | 200             | 0.07            | 26.93                          | 26.44                     |
| 60              | 3               | 100             | 0.12            | 13.47                          | 13.74                     |
| 140             | 3               | 100             | 0.12            | 15.83                          | 17.61                     |
| 60              | 7               | 100             | 0.12            | 12.91                          | 12.83                     |
| 140             | 7               | 100             | 0.12            | 14.23                          | 16.14                     |
| 60              | 3               | 200             | 0.12            | 11.25                          | 11.24                     |
| 140             | 3               | 200             | 0.12            | 16.42                          | 15.99                     |
| 60              | 7               | 200             | 0.12            | 15.74                          | 13.85                     |
| 140             | 7               | 200             | 0.12            | 16.33                          | 18.05                     |
| 20              | 5               | 150             | 0.095           | 12.55                          | 15.41                     |
| 180             | 5               | 150             | 0.095           | 29.29                          | 25.46                     |
| 100             | 1               | 150             | 0.095           | 9.76                           | 9.30                      |
| 100             | 9               | 150             | 0.095           | 7.62                           | 7.11                      |
| 100             | 5               | 50              | 0.095           | 19.6                           | 16.88                     |
| 100             | 5               | 250             | 0.095           | 20.83                          | 22.58                     |
| 100             | 5               | 150             | 0.045           | 28.98                          | 29.16                     |
| 100             | 5               | 150             | 0.145           | 18.44                          | 17.29                     |
| 100             | 5               | 150             | 0.095           | 28.16                          | 28.24                     |
| 100             | 5               | 150             | 0.095           | 28.22                          | 28.24                     |
| 100             | 5               | 150             | 0.095           | 28.34                          | 28.24                     |
| 100             | 5               | 150             | 0.095           | 28.29                          | 28.24                     |
| 100             | 5               | 150             | 0.095           | 28.24                          | 28.24                     |
| 100             | 5               | 150             | 0.095           | 28.21                          | 28.24                     |

**Table S2: Range of the variable parameters**

| <b>Variable</b>             | <b>Unit</b>           | <b>-2</b> | <b>Low factorial<br/>(-1)</b> | <b>Center<br/>(0)</b> | <b>High factorial<br/>(+1)</b> | <b>+2</b> |
|-----------------------------|-----------------------|-----------|-------------------------------|-----------------------|--------------------------------|-----------|
| <b>Exposure Time</b>        | (min)                 | 20        | 60                            | 100                   | 140                            | 180       |
| <b>pH</b>                   |                       | 1         | 3                             | 5                     | 7                              | 9         |
| <b>Catalyst Dose</b>        | (g)                   | 0.045     | 0.07                          | 0.095                 | 0.12                           | 0.145     |
| <b>MB<br/>Concentration</b> | (mg L <sup>-1</sup> ) | 50        | 100                           | 150                   | 200                            | 250       |

**Table S3.** Coefficient T and P value table

| <b>Factor</b>        | <b>Coefficient Estimate</b> | <b>Standard Error</b> | <b>T-Value</b> | <b>P-Value</b> | <b>VIF</b> |
|----------------------|-----------------------------|-----------------------|----------------|----------------|------------|
| <b>Intercept</b>     | 28.24                       | 0.82                  | 14.43          | 0.000          |            |
| <b>A-Time</b>        | 2.51                        | 0.41                  | 1.04           | 0.313          | 1.00       |
| <b>B-pH</b>          | -0.55                       | 0.41                  | -1.18          | 0.256          | 1.00       |
| <b>C-Conc</b>        | 1.42                        | 0.41                  | 3.38           | 0.004          | 1.00       |
| <b>D-Dose</b>        | -2.97                       | 0.41                  | -3.75          | 0.002          | 1.00       |
| <b>AB</b>            | -0.14                       | 0.50                  | -1.08          | 0.295          | 1.00       |
| <b>AC</b>            | 0.22                        | 0.50                  | 1.59           | 0.132          | 1.00       |
| <b>AD</b>            | -0.49                       | 0.50                  | -1.06          | 0.303          | 1.00       |
| <b>BC</b>            | 0.88                        | 0.50                  | 0.16           | 0.877          | 1.00       |
| <b>BD</b>            | 0.84                        | 0.50                  | 1.96           | 0.067          | 1.00       |
| <b>CD</b>            | -1.57                       | 0.50                  | -2.05          | 0.058          | 1.00       |
| <b>A<sup>2</sup></b> | -1.95                       | 0.38                  | -2.99          | 0.009          | 1.05       |
| <b>B<sup>2</sup></b> | -5.01                       | 0.38                  | -4.57          | 0.000          | 1.05       |
| <b>C<sup>2</sup></b> | -2.13                       | 0.38                  | -0.08          | 0.937          | 1.05       |
| <b>D<sup>2</sup></b> | -1.25                       | 0.38                  | -2.32          | 0.034          | 1.05       |

**Table S4. Non-linear kinetic data for photodegradation of MB onto GG-Alg@Ag bionanocomposite**

| <b>Model</b>               | <b>Parameters</b>                                      | <b>Values</b>         |
|----------------------------|--------------------------------------------------------|-----------------------|
| <b>Pseudo First Order</b>  | Q <sub>m</sub> exp (mg g <sup>-1</sup> )               | 30.73                 |
|                            | Q <sub>m</sub> cal (mg g <sup>-1</sup> )               | 29.63                 |
|                            | K <sub>1</sub> (min <sup>-1</sup> )                    | 0.15                  |
|                            | R <sup>2</sup>                                         | 0.74                  |
|                            | χ <sup>2</sup>                                         | 5.12                  |
|                            | SSE                                                    | 0.92                  |
| <b>Pseudo Second Order</b> | Q <sub>m</sub> exp (mg g <sup>-1</sup> )               | 30.73                 |
|                            | Q <sub>m</sub> cal (mg g <sup>-1</sup> )               | 31.07                 |
|                            | K <sub>2</sub> (g mg <sup>-1</sup> min <sup>-1</sup> ) | 8.72×10 <sup>-3</sup> |
|                            | R <sup>2</sup>                                         | 0.95                  |
|                            | χ <sup>2</sup>                                         | 0.99                  |
|                            | SSE                                                    | 0.48                  |

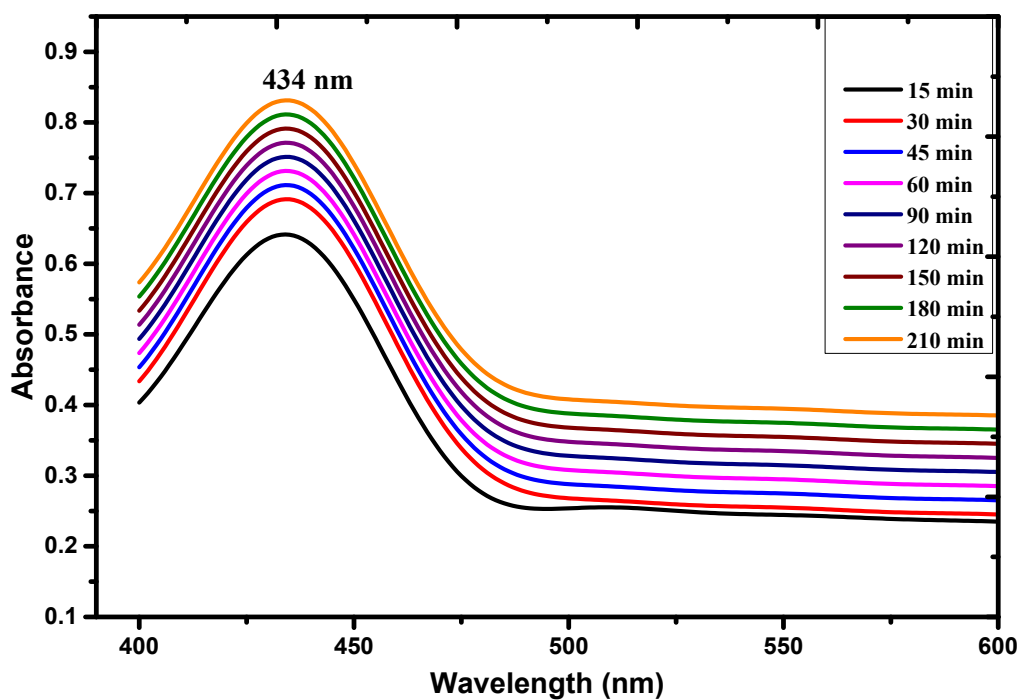

**Figure S1.** Time-dependent UV-VIS plot to observe the nucleation of GG-Alg@Ag bionanocomposite

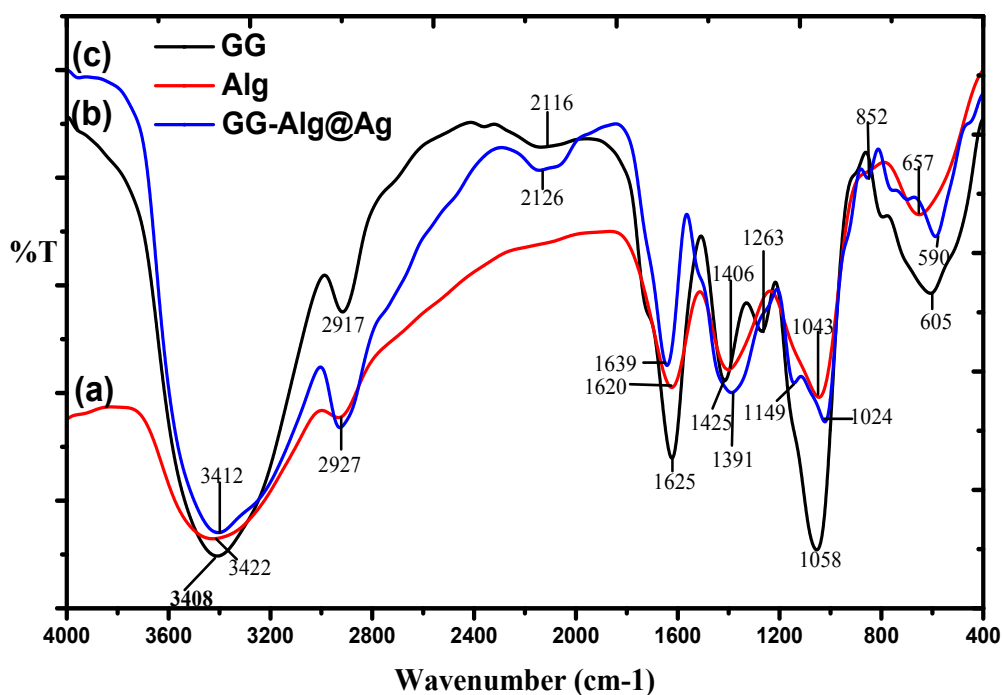

**Figure S2.** FTIR spectra of (a) alginate (red line) (b) guar gum (black line) and (c) GG-Alg@Ag (blue line)

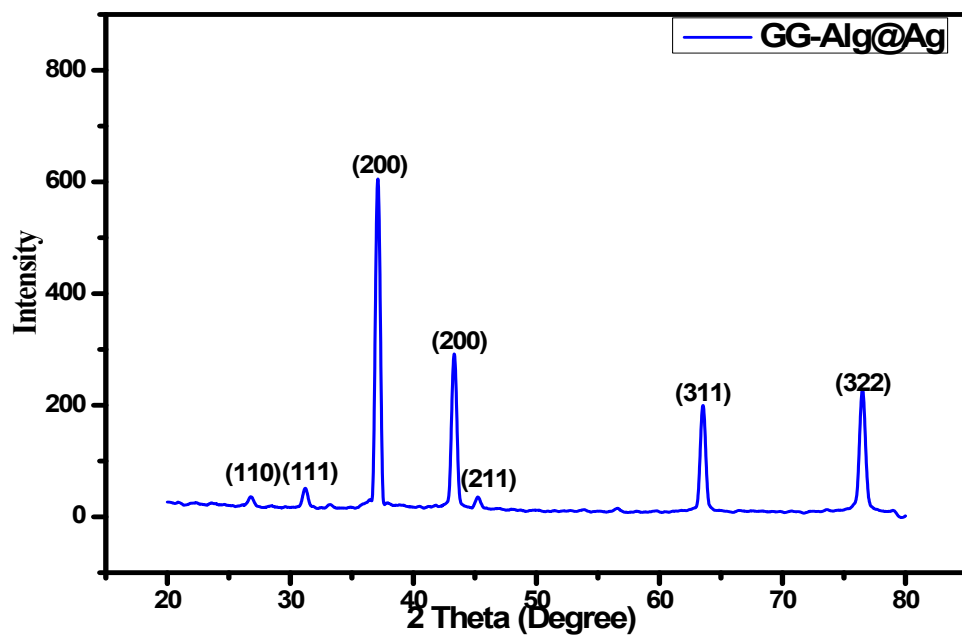

Figure S3. XRD patterns of GG-Alg@Ag bionanocomposite

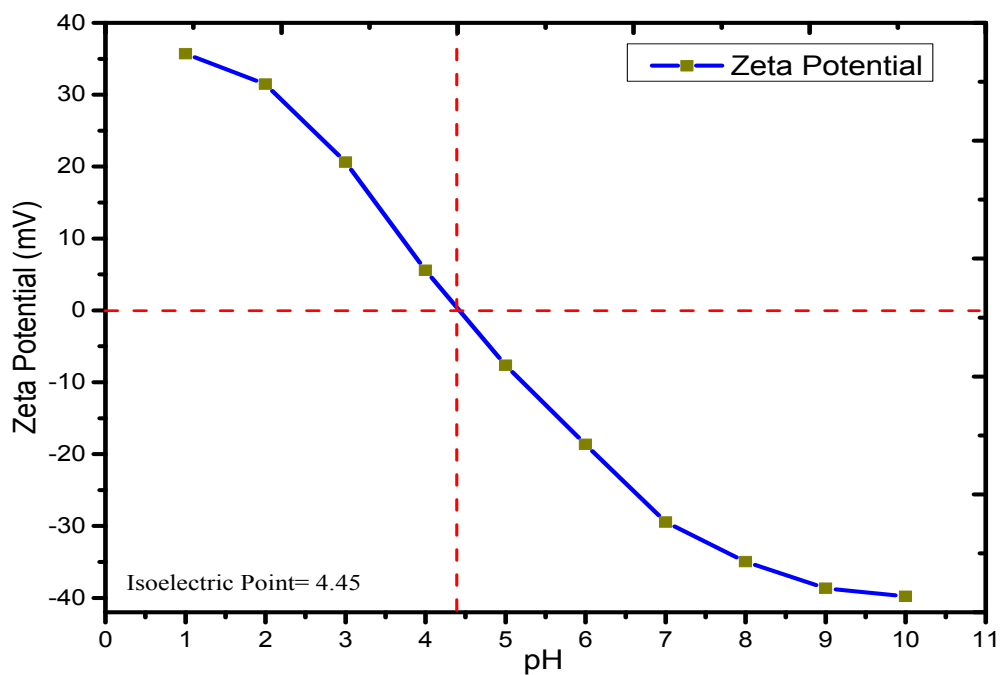

Figure S4. Zeta Potential variation curve for GG-Alg@Ag bionanocomposite with pH

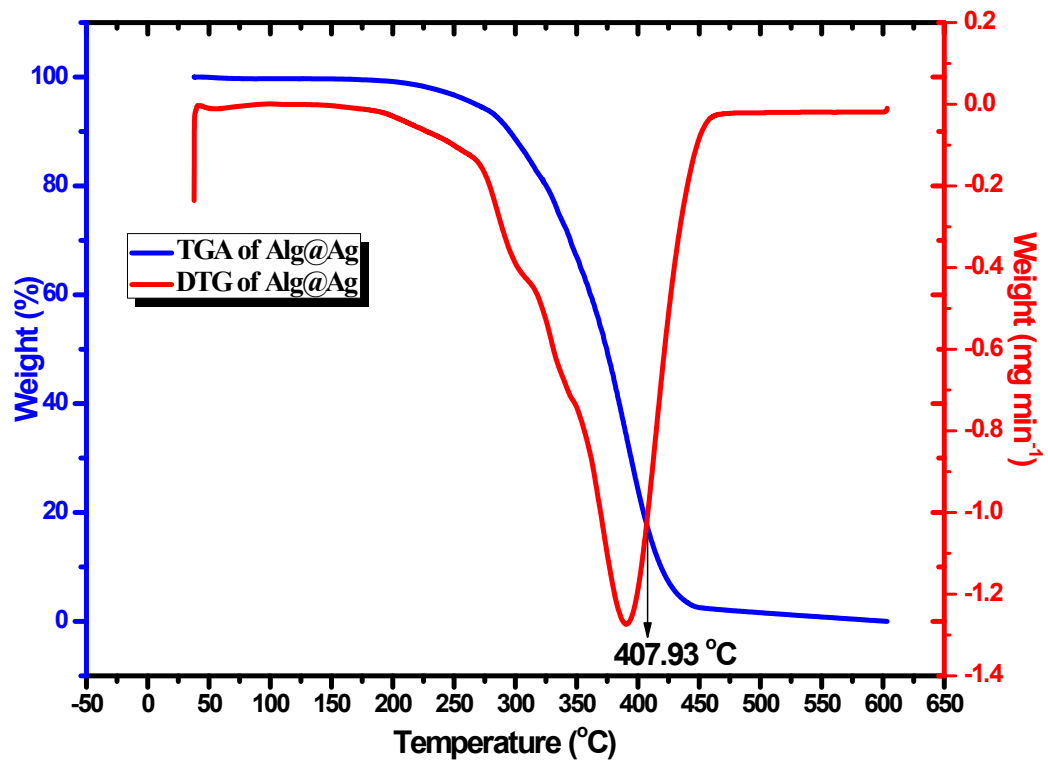

Figure S5. TGA and DTG thermogram of GG-Alg@Ag bionanocomposite
